# Supplementary material
Source: PubMed Central journal article supplement (PMC3012521)
Supplement: 1010297107_pnas.1010297107_SI.pdf [file 1010297107_pnas.1010297107_SI.pdf]

# Supporting Information

Lee et al. 10.1073/pnas.1010297107

## SI Methods and Materials

**Numerical Simulation.** We used a numerical model to solve the 3D incompressible Navier–Stokes equations in the reference frame of a particle moving in a rectangular channel (1). For these simulations, whereas the position of particle is fixed, the dynamics of the system are updated to achieve force- and torque-free conditions for the particle (i.e., the steady-state behavior). More precisely, a sphere, of diameter  $a$ , is stationary in a  $w \times h$  rectangular channel, with sidewalls moving backward at the presumptive sphere velocity  $u_p$ . The flow at the position of the sphere was determined for one isolated particle by specifying a volumetric flow rate  $q$ , through setting inlet or outlet boundary conditions to fully developed laminar inflow or outflow in software (no periodic boundary conditions). Scripts run by COMSOL Multiphysics are used to solve the Navier–Stokes equations and update conditions to achieve steady state. Rotation is modeled by modifying the slip velocity at the surface of the sphere according to its rigid rotation. In addition to these boundary conditions, fluid density  $\rho$  and viscosity  $\mu$ , were set to values of water, or  $\rho$  was set to zero for the Stokes flow case. Beginning with the initial condition of a stationary sphere (i.e., particle and walls at rest), we determined forces and torques by integrating force per area ( $F''$ ) and torque density ( $r \times F''$ ) across the particle surface in software. We then iteratively updated the wall velocity ( $u_p$ ) and particle rotation until the sphere was force-free in the axial ( $x$ ) direction and experienced zero net torque in all directions, to the limit in numerical precision. The streamlines in the frame of reference of a translating particle that is rotating at steady state could then be obtained.

Using this method, first, we conducted simulations for particle positions 1  $\mu\text{m}$  apart along the short axis of the channel to deter-

mine the inertial focusing position. Varying the sphere position yielded the steady state lateral force for a particle held to a particular  $y$ -position in the channel cross section at ( $z = 0$ ). Based on interpolating the position where the lateral force curve crossed zero we found the focusing position of the particle. Placing a particle at this position we solved the Navier–Stokes equations to obtain the flow fields in the microchannel for several conditions (reported in Fig. 3).

**Image Analysis.** Particle motion was captured with a high-speed camera (Phantom V7.3) at up to 100,000 frame/s rate. To study the interaction between particles, it was necessary to follow the particle motion as long as possible. Therefore we used a low magnification objective lens to achieve a large field of view, while sacrificing resolution. The  $\times 2$  magnification objective lens allowed an 8.8 mm wide field of view with our optical setup. With a typical flow rate of  $\sim 80 \mu\text{L}/\text{min}$  in a  $25 \mu\text{m} \times 90 \mu\text{m}$  channel, it takes  $\sim 14$  ms for particles to move across the whole field of view. Movies were taken at  $\sim 5$  mm downstream from inlet, at which point the particles are mostly at the same  $y$ -position but not fully focused yet (possibly at different  $z$ -positions). Captured movie frames are combined to build a 3D stack ( $x$ - $y$ - $t$ ) with Image J (Fig. S1). Then the 3D stack was resliced in the  $x$ - $t$  plane. With the choice of  $y$  equal to the focusing position, we get a particle trajectory in  $x$ - $t$  plane. Graphs showing particle dynamics, as in Fig. 2 and 5, are achieved by skewing the  $x$ - $t$  image horizontally, which is equivalent to a coordinate transformation of  $x' = x - vt$  ( $v = \frac{\Delta x}{\Delta t} = \tan \theta$ , where  $\theta$  is the skewed angle).

1. Di Carlo D, Edd JF, Humphry KJ, Stone HA, Toner M (2009) Particle segregation and dynamics in confined flows. *Phys Rev Lett* 102:094503.





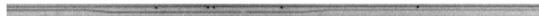

**Movie S5.** Tuning of particle spacing with an expansion-contraction channel. The interparticle spacing of the particle pair changes along the channel; first, decreasing at the expansion then slowly increasing, and finally increasing further at the contraction. Channel dimension: 25  $\mu\text{m}$  wide at narrow region and 45  $\mu\text{m}$  at wide region, 85  $\mu\text{m}$  high. Particle size: 9.9  $\mu\text{m}$ .  $\text{Re} = 16$  at the narrow region. The movie is  $\sim 600$  times slowed from real time (total  $\sim 16$  ms).

[Movie S5 \(MOV\)](#)
